# Supplementary material
Source: PubMed Central journal article supplement (PMC4046194)
Supplement: Supp_Fig1.pdf [file Supp_Fig1.pdf]

## Supplementary Data

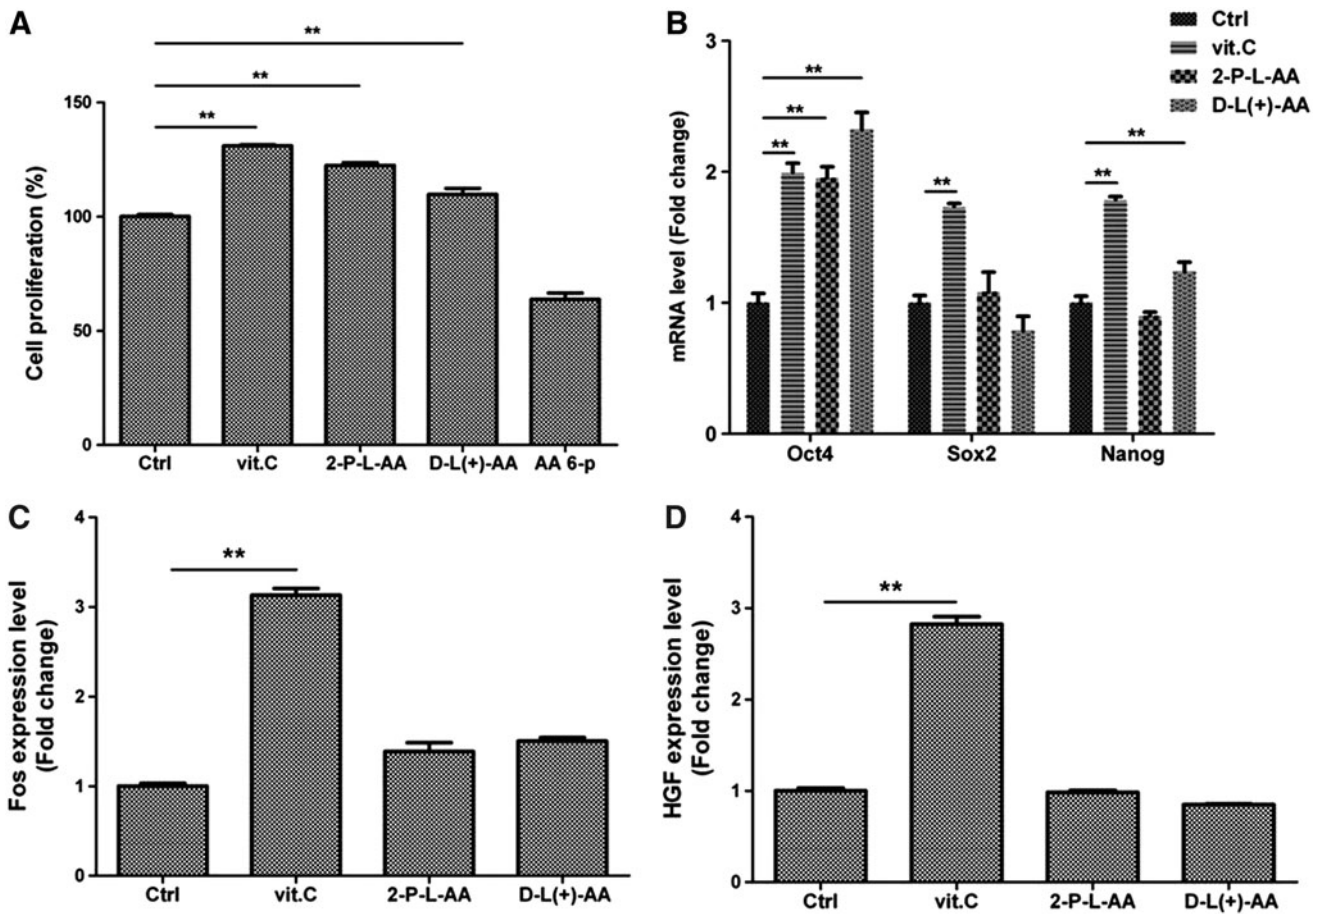

**SUPPLEMENTARY FIG. S1.** Stimulatory effects of vitamin C and its derivatives on adipose-derived stem cells (ASCs). Vitamin C showed the strongest stimulatory effects on ASCs. **(A)** Effect on proliferation. **(B)** Effect on mRNA expression of pluripotency markers. **(C)** Effect on mRNA expression of Fos. **(D)** Effect on hepatocyte growth factor (HGF) expression. vit.C, vitamin C; 2-P-L-AA, 2-phospho-L-ascorbic acid; D-L(+)-AA, dehydro-L-(+)-ascorbic acid dimer; AA6-P, ascorbic acid 6-palmitate. Data are mean  $\pm$  STD (n.s., not significant; \*\* $P < 0.01$ , Student's *t*-test).
