# Supplementary material
Source: PubMed Central journal article supplement (PMC4046194)
Supplement: Supp_Fig2.pdf [file Supp_Fig2.pdf]

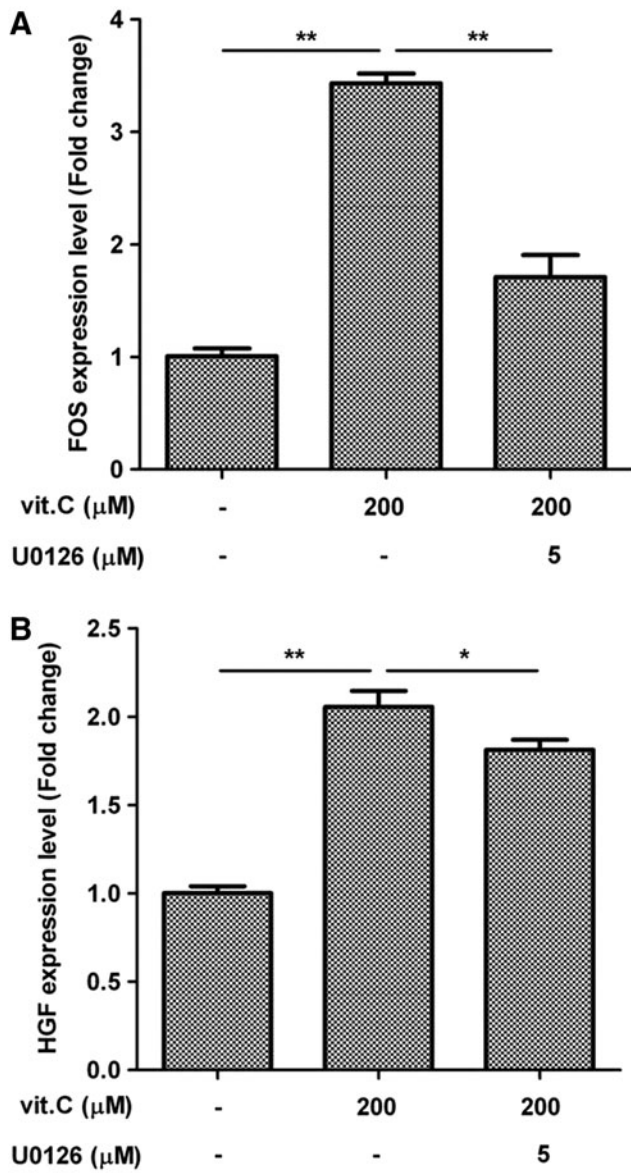

**SUPPLEMENTARY FIG. S2.** Inhibition of the mitogen-activated protein kinase (MAPK) pathway and gene expression. Pharmacological inhibition of the MAPK pathway by treatment with U0126 significantly reduced Fos expression (A), and slightly reduced HGF expression (B). Data are mean  $\pm$  STD (\* $P$  < 0.05, \*\* $P$  < 0.01, Student's  $t$ -test).
