# Supplementary material
Source: PubMed Central journal article supplement (PMC4046194)
Supplement: Supp_Fig3.pdf [file Supp_Fig3.pdf]

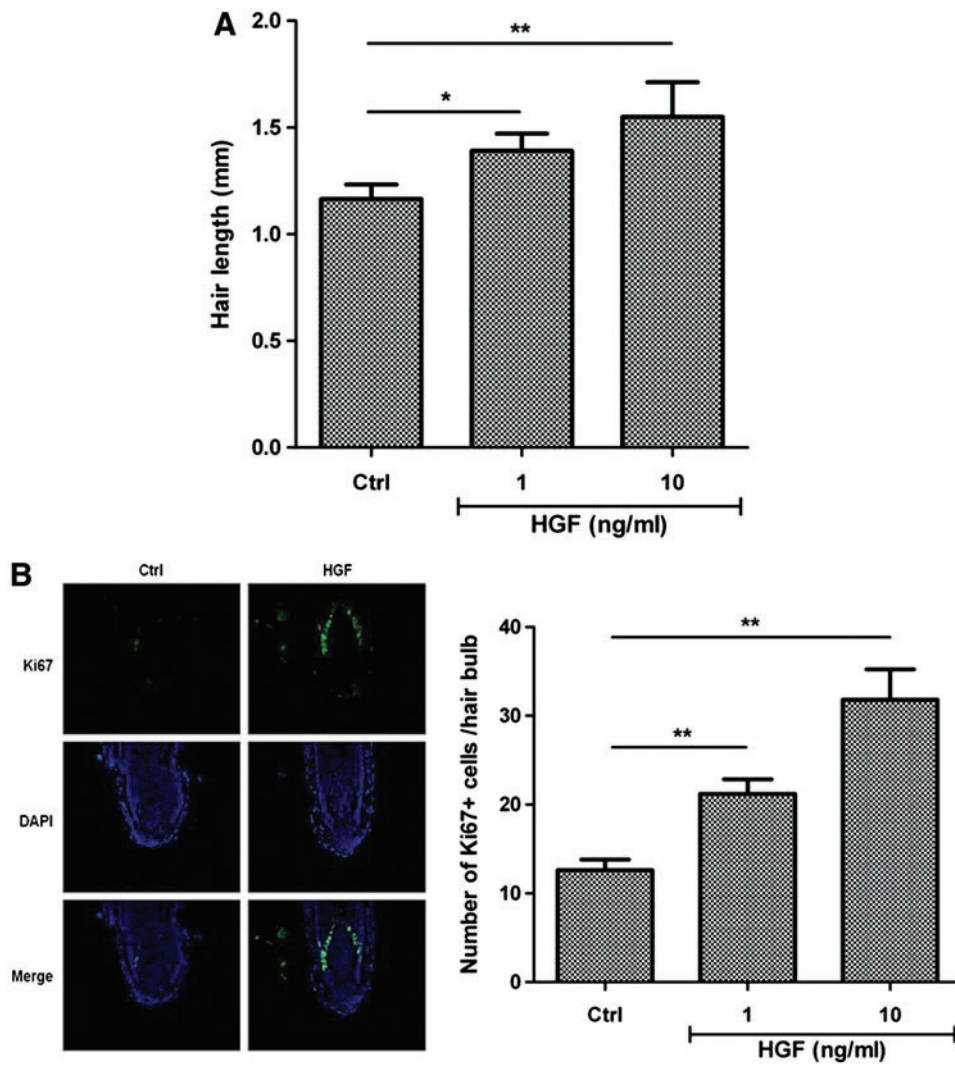

**SUPPLEMENTARY FIG. S3.** Hair growth promotion effects of HGF in hair organ culture. **(A)** HGF treatment (1 and 10 ng/mL) increased hair length in hair organ culture. **(B)** In addition, the number of Ki<sub>67</sub>-positive matrix keratinocytes around the dermal papilla was significantly increased by HGF treatment. Data are mean ± STD (\**P* < 0.05, \*\**P* < 0.01, Student's *t*-test).
