# Supplementary material
Source: PubMed Central journal article supplement (PMC4046194)
Supplement: Supp_Fig4.pdf [file Supp_Fig4.pdf]

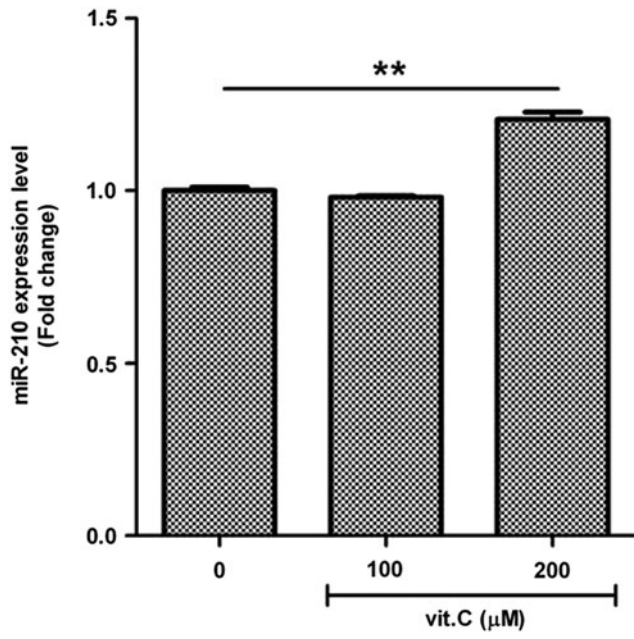

**SUPPLEMENTARY FIG. S4.** *miR-210* expression in ASCs 24h after vitamin C treatment. Data are mean  $\pm$  STD (\*\* $P < 0.01$ , Student's *t*-test).
