# Supplementary material
Source: PubMed Central journal article supplement (PMC4046194)
Supplement: Supp_Fig5.pdf [file Supp_Fig5.pdf]

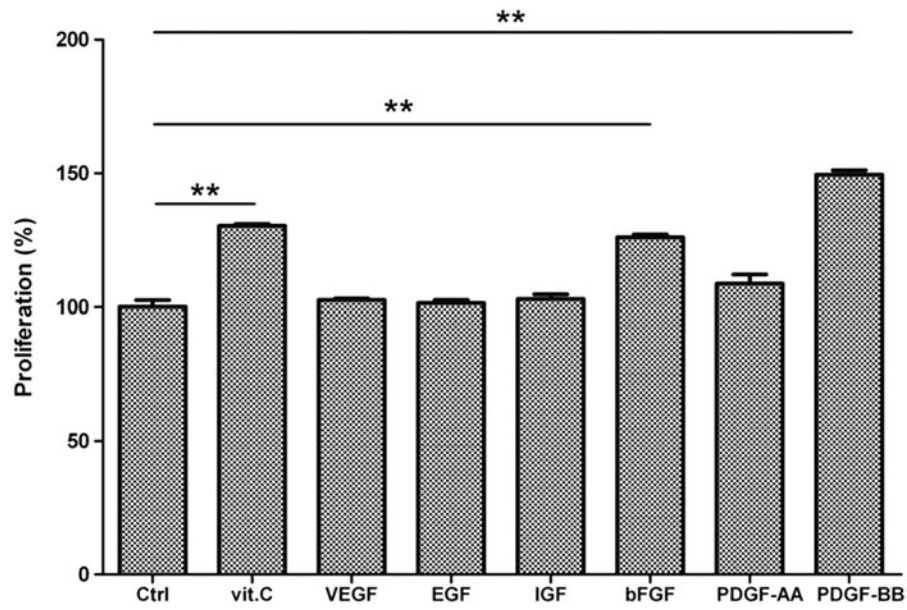

**SUPPLEMENTARY FIG. S5.** Comparison of cell proliferation in ASCs treated with vitamin C (200  $\mu$ M) and six growth factors (5 ng/mL). Data are mean  $\pm$  STD (\*\* $P$  < 0.01, Student's  $t$ -test).
